# Supplementary material for: Parkinson’s Disease, Impulsive-Compulsive Behaviors, and Health-Related Quality of Life
Source: PubMed Central journal article supplement — J Mov Disord. 2023 Nov 6;17(1):82–8. doi: 10.14802/jmd.23042 (PMC10846971; doi:10.14802/jmd.23042), 2023-11-06
Supplement: jmd-23042-Supplementary-Figure-1.pdf [file jmd-23042-Supplementary-Figure-1.pdf]

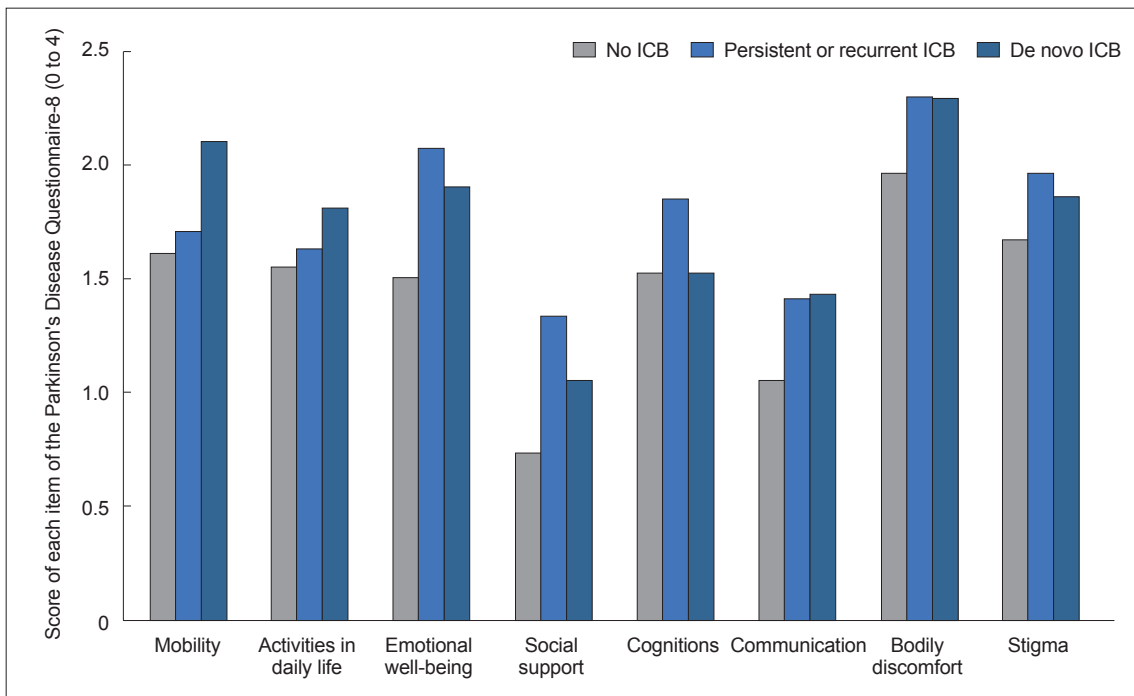

**Supplementary Figure 1.** HRQOL according to the absence or presence of a current ICB, be it was persistent/recurrent or de novo ( $n = 169$ ). HRQOL, health-related quality of life; ICB: impulsive-compulsive behavior.
