# Supplementary material for: Parkinson’s Disease, Impulsive-Compulsive Behaviors, and Health-Related Quality of Life
Source: PubMed Central journal article supplement — J Mov Disord. 2023 Nov 6;17(1):82–8. doi: 10.14802/jmd.23042 (PMC10846971; doi:10.14802/jmd.23042), 2023-11-06
Supplement: jmd-23042-Supplementary-Table-1.pdf [file jmd-23042-Supplementary-Table-1.pdf]

**Supplementary Table 1.** Characteristics of patients with de novo ICB and those whose ICB persisted or re-occurred (*n* = 48)

| Variable                | De novo ICB<br>( <i>n</i> = 21) | Persistent or<br>recurrent ICB<br>( <i>n</i> = 27) | <i>p</i><br>value |
|-------------------------|---------------------------------|----------------------------------------------------|-------------------|
| Sex, male               | 16 (76.2)                       | 15 (55.6)                                          | 0.1381            |
| Current age (yr)        | 62.7 ± 9.7                      | 63.3 ± 7.6                                         | 1.0000            |
| Age of PD onset (yr)    | 53.0 ± 8.6                      | 54.4 ± 8.0                                         | 0.8028            |
| PD duration (yr)        | 9.7 ± 3.9                       | 8.9 ± 3.8                                          | 0.2857            |
| Number of pills per day | 9.0 ± 4.0                       | 8.3 ± 3.2                                          | 0.4581            |
| LEDD                    | 1,281.0 ± 696.6                 | 1,060.0 ± 594.5                                    | 0.1869            |
| PDQ-8 score             | 43.6 ± 13.9                     | 44.6 ± 18.1                                        | 0.9418            |

Values are presented as mean ± standard deviation or number (%).  
ICB, impulsive-compulsive behavior; PD, Parkinson's disease; LEDD, le-  
vodopa equivalent daily dose; PDQ, Parkinson Disease Questionnaire.
